# Supplementary material
Source: publisher site journal article supplement (http://www.kjim.org/upload/media/kjim-2023-086-Supplementary-Table-1.pdf)
Supplement: Supplementary file 1 [file kjim-2023-086-Supplementary-Table-1.pdf]

**Supplementary Table 1. Patient recruitment sites in South Korea**

| Site #                       | Site name                                   | Patients      |
|------------------------------|---------------------------------------------|---------------|
| SABINA III Pan International |                                             | 8,351 (100.0) |
| Asia                         |                                             | 3,066 (36.7)  |
| South Korea                  |                                             | 476 (5.7)     |
| KOR01                        | Asan Medical Center                         | 34 (0.4)      |
| KOR02                        | Hanyang University Seoul Hospital           | 35 (0.4)      |
| KOR03                        | Seoul National University Bundang Hospital  | 34 (0.4)      |
| KOR04                        | Seoul National University Hospital          | 39 (0.5)      |
| KOR05                        | Konkuk University Medical Center            | 43 (0.5)      |
| KOR06                        | Wonju Severance Christian Hospital          | 35 (0.4)      |
| KOR07                        | Hanyang University Guri Hospital            | 36 (0.4)      |
| KOR08                        | Pusan National University Hospital          | 34 (0.4)      |
| KOR09                        | Gachon University Gil Medical Center        | 38 (0.5)      |
| KOR10                        | Soon Chun Hyang University Hospital Bucheon | 30 (0.4)      |
| KOR11                        | GF Internal Medicine                        | 25 (0.3)      |
| KOR12                        | Soo Internal Medicine Clinic                | 15 (0.2)      |
| KOR13                        | Leeyangdeok Clinic                          | 30 (0.4)      |
| KOR14                        | Goodbreath Medical Center                   | 19 (0.2)      |
| KOR15                        | Sanbon Yonsei Medical Clinic                | 19 (0.2)      |
| KOR16                        | Dami Internal Medicines                     | 10 (0.1)      |

Values are presented as number (%).

SABA, short-acting  $\beta_2$ -agonist; SABINA, SABA use IN Asthma.
